# Supplementary material
Source: publisher figshare collection journal article supplement (https://acs.figshare.com/ndownloader/files/5611134)
Supplement: Supplementary file 1 [file 5611134]

**Monte Carlo Study of Degenerate Behavior of AB Diblock Copolymer/Nanoparticle under  
Cylindrical Confinement**

Yingying Wang<sup>†,‡,§</sup>, Yuanyuan Han<sup>\*,†</sup>, Jie Cui<sup>\*,†</sup>, Wei Jiang<sup>†</sup>, Yingchun Sun<sup>‡</sup>

<sup>†</sup>*State Key Laboratory of Polymer Physics and Chemistry, Changchun Institute of Applied Chemistry, Chinese Academy of Sciences, Changchun 130022, Jilin, China*

<sup>‡</sup>*Northeast Normal University, School of Physics, Changchun 130024, Jilin, China*

<sup>§</sup>*University of Chinese Academy of Sciences, Beijing 100049, People's Republic of China*

\*Corresponding authors: \*E-mail: [yyhan@ciac.ac.cn](mailto:yyhan@ciac.ac.cn) (Yuanyuan Han); [jcui@ciac.ac.cn](mailto:jcui@ciac.ac.cn) (Jie Cui).

Telephone: 86-431-85262642. Fax: 86-431-85262126.

## ASSOCIATED CONTENT

### Supporting Information

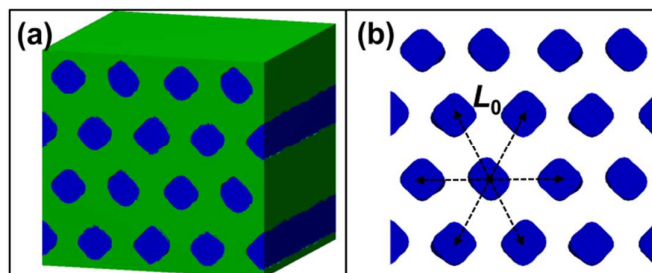

**Figure S1.** Typical hexagonally packed cylindrical phase formed by  $A_5B_{15}$  diblock copolymers in bulk (a). For the purpose of clarity, only minor component A is drawn in blue (b). The minority block A and majority block B are represented by blue and green, respectively.

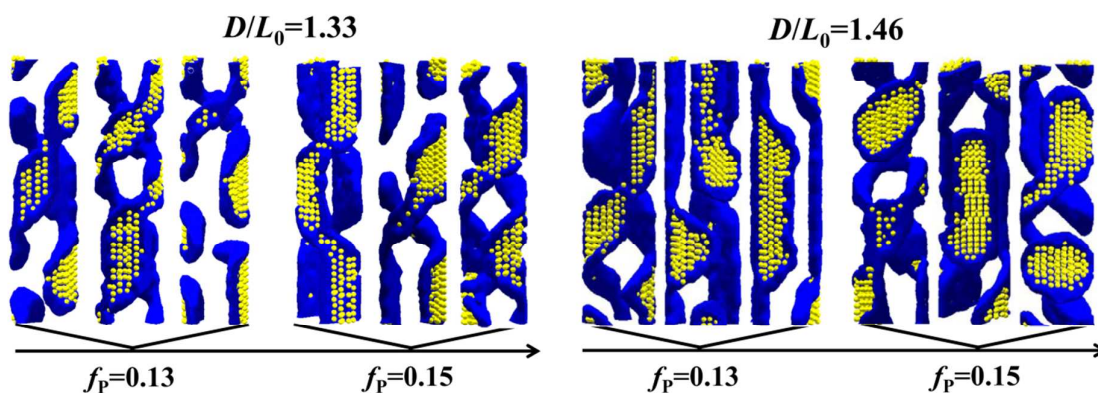

**Figure S2.** Typical disordered structures formed by  $A_5B_{15}$  diblock copolymer/NP mixture in cylindrical pores with different pore sizes ( $D/L_0$ ) and NP contents ( $f_p$ ). For the purpose of clarity, only minor component A and NPs are drawn. The minority block A and NPs are represented by blue and yellow, respectively.

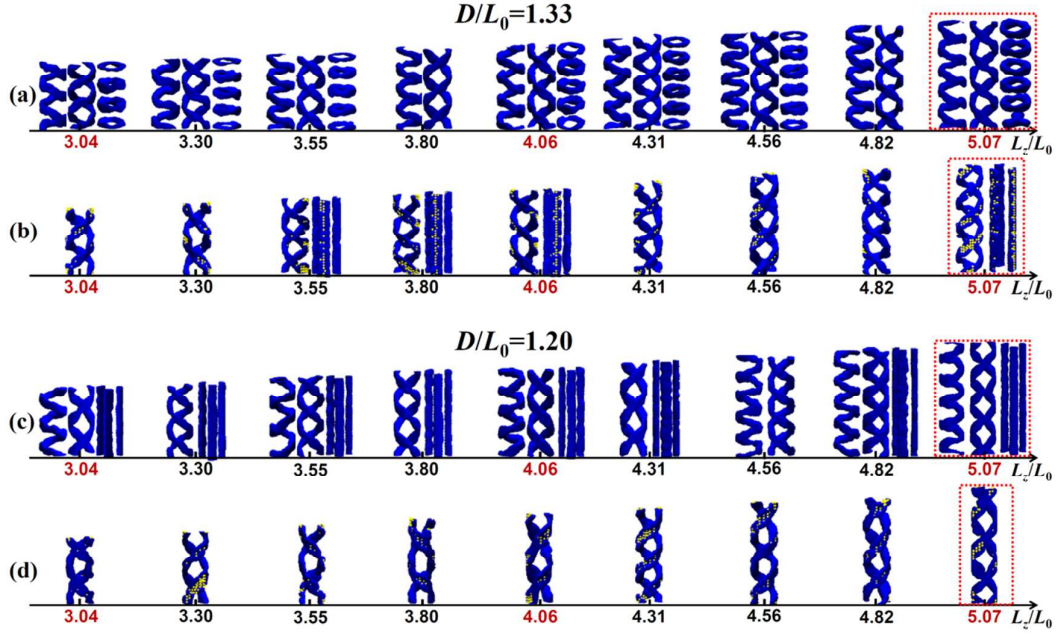

**Figure S3.** Nanostructures self-assembled by BCP/NP mixture in cylindrical pores as a function of the pore length ( $L_z/L_0$ ). The pore diameters and NP contents are (a)  $D/L_0=1.33$ ,  $f_p=0$ ; (b)  $D/L_0=1.33$ ,  $f_p=0.05$ ; (c)  $D/L_0=1.20$ ,  $f_p=0$ ; (d)  $D/L_0=1.20$ ,  $f_p=0.05$ . The nanostructures obtained at  $L_z=80$  ( $L_z/L_0=5.07$ ) (Figure 2 in the manuscript) are also given for the purpose of comparison, which are marked with red boxes. Only the minority blocks A and NPs are drawn for clarity.

**Table S1.** Average interactive enthalpy densities of double helices under different pore lengths ( $L_z/L_0$ ) and NP contents ( $f_p$ ). The pore size is fixed at  $D/L_0=1.20$ .

| NP content<br>( $f_p$ ) | Pore length<br>( $L_z/L_0$ ) |       |       |       |       |       |       |       |       |
|-------------------------|------------------------------|-------|-------|-------|-------|-------|-------|-------|-------|
|                         | 3.04                         | 3.33  | 3.55  | 3.80  | 4.06  | 4.31  | 4.56  | 4.82  | 5.07  |
| 0.00                    | 1.029                        | 1.032 | 1.031 | 1.032 | 1.031 | 1.030 | 1.034 | 1.030 | 1.030 |
| 0.05                    | 1.024                        | 1.024 | 1.025 | 1.030 | 1.028 | 1.027 | 1.035 | 1.026 | 1.026 |

**Table S2.** Average interactive enthalpy densities of double helices under different pore lengths ( $L_z/L_0$ ) and NP contents ( $f_p$ ). The pore size is fixed at  $D/L_0 = 1.33$ .

| NP content<br>( $f_p$ ) | Pore length<br>( $L_z/L_0$ ) |       |       |       |       |       |       |       |       |
|-------------------------|------------------------------|-------|-------|-------|-------|-------|-------|-------|-------|
|                         | 3.04                         | 3.33  | 3.55  | 3.80  | 4.06  | 4.31  | 4.56  | 4.82  | 5.07  |
| 0.00                    | 1.037                        | 1.026 | 1.026 | 1.015 | 1.021 | 1.023 | 1.029 | 1.026 | 1.032 |
| 0.05                    | 1.025                        | 1.020 | 1.028 | 1.022 | 1.027 | 1.025 | 1.020 | 1.021 | 1.025 |

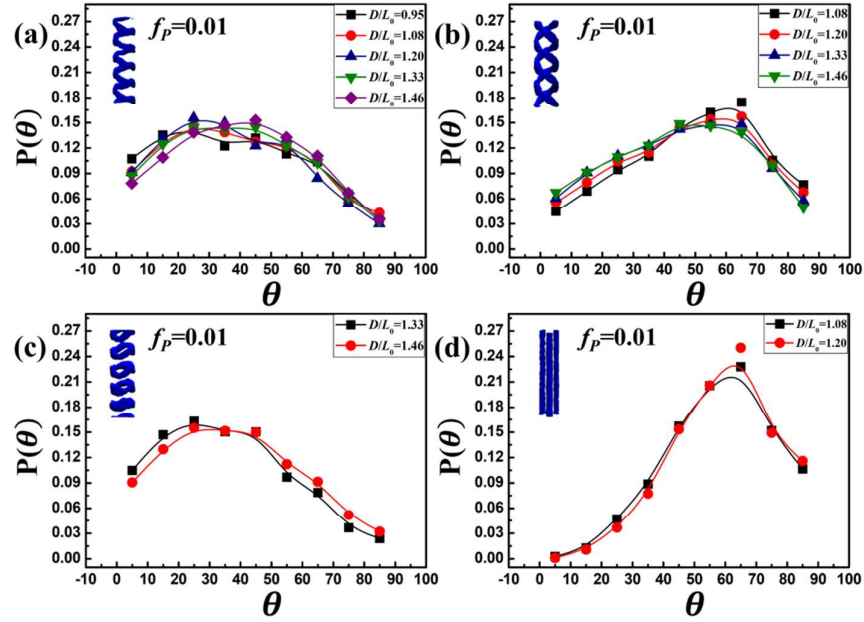

**Figure S4.** Distribution curves of the orientation angle  $\theta$  for different degenerate structures obtained under different pore sizes in the case of  $f_p = 0.01$ .

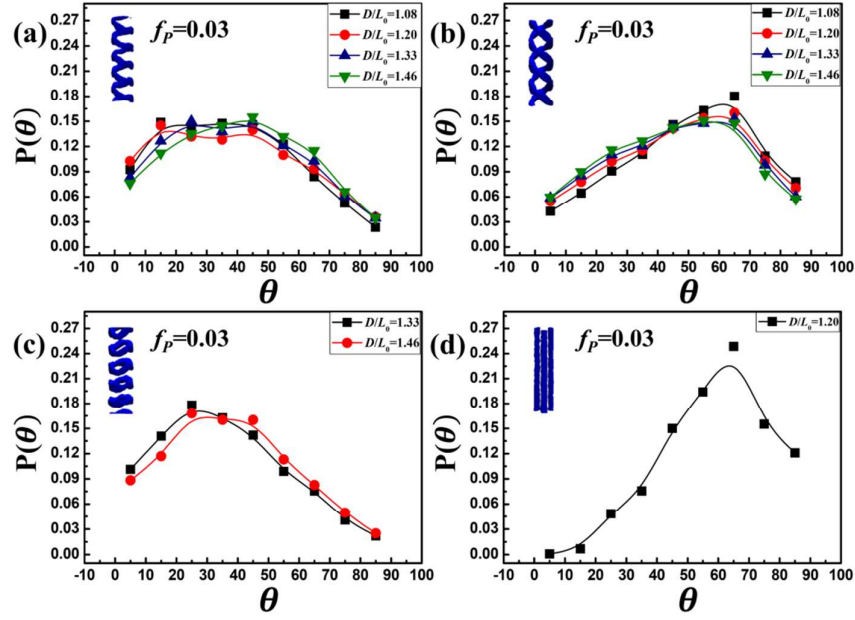

**Figure S5.** Distribution curves of the orientation angle  $\theta$  for different degenerate structures obtained under different pore sizes in the case of  $f_p = 0.03$ .

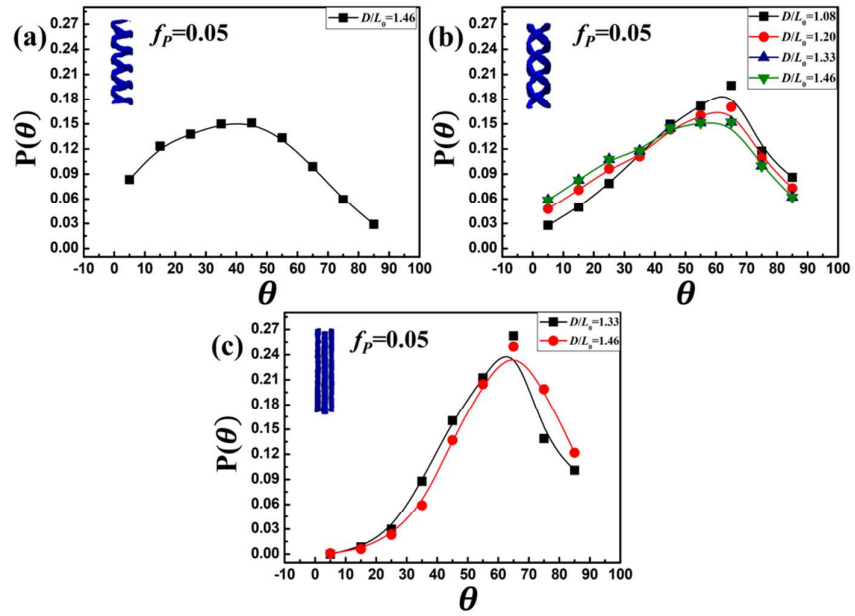

**Figure S6.** Distribution curves of the orientation angle  $\theta$  for different degenerate structures obtained under different pore sizes in the case of  $f_p = 0.05$ .

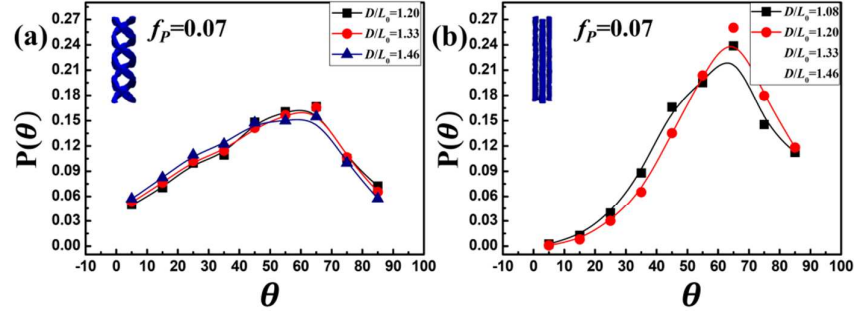

**Figure S7.** Distribution curves of the orientation angle  $\theta$  for different degenerate structures obtained under different pore sizes in the case of  $f_p = 0.07$ .

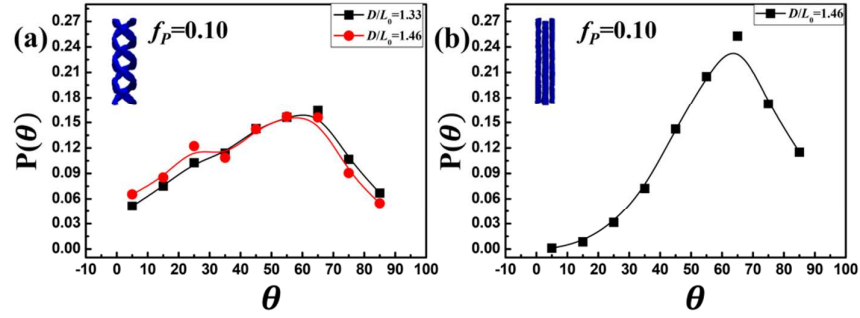

**Figure S8.** Distribution curves of the orientation angle  $\theta$  for different degenerate structures obtained under different pore sizes in the case of  $f_p = 0.10$ .
